# Supplementary material
Source: PubMed Central journal article supplement (PMC6643508)
Supplement: ao8b02556_si_001.pdf [file ao8b02556_si_001.pdf]

## **Supporting information**

# **Synthesis of highly stable Pd@CeO<sub>2</sub> catalyst for methane combustion with the synergistic effect of urea and citric acid**

Guohui Cai, Wei Luo, Yihong Xiao, Yong Zheng, Fulan Zhong, Yingying Zhan\*, Lilong Jiang

National Engineering Research Center of Chemical Fertilizer Catalyst, College of Chemical Engineering, Fuzhou University, Gongye Road No.523, Fuzhou 350002, Fujian, P. R. China

\*Corresponding author:

PhD. Yingying Zhan

Tel: +86 0591 83731234-8601, Fax: +86 0591 83709796, E-mail: zhanyingying@fzu.edu.cn

## **1. Synthesis of I-Pd/CeO<sub>2</sub>-*T* catalyst by impregnation method**

### **1.1. Synthesis of catalyst carriers**

In a typical synthesis, 0.21 g of cerium nitrate, 0.03 g of urea and 0.051 g of citric acid were successively dissolved in a water/ethanol mixture with a volume ratio of 7:1 at room temperature. The resultant mixture was vigorously stirred for 20 min, then 0.3 mL of hydrogen peroxide solution was added. Afterward, the final solution was sealed into an autoclave with a Teflon-lined, heated to 120 °C and maintained for 24 h. The as-prepared product was centrifuged, washed with deionized water and ethanol repeatedly until pH  $\approx$  7, and subsequently dried at 60 °C for 7 h. The product was further calcined at 400 °C with a ramping rate of 1 °C min<sup>-1</sup> and held for 2 h. After naturally cooling to room temperature, the catalyst carriers CeO<sub>2</sub> was obtained.

### **1.2. Synthesis of catalysts**

Taking the as-synthesized CeO<sub>2</sub> as a carrier, and Pd(NO<sub>3</sub>)<sub>2</sub> solution as a precursor, the supported Pd/CeO<sub>2</sub> catalysts with a constant Pd loading of 1 wt% (theoretic value) were prepared by the incipient wetness impregnation method at room temperature. The product was calcined at 400 °C for 4 h (1 °C min<sup>-1</sup> ramping rate), then calcined at 600 °C or 1000 °C for 2 h at the same speed. The prepared catalysts were referred to I-Pd/CeO<sub>2</sub>-*T*, where *T* represented the calcination temperature (*T* = 600, 1000 °C).

## **2. Synthesis of C-Pd/CeO<sub>2</sub>-*T* catalyst by coprecipitation method**

In a typical synthesis, 2.0 g of cerium nitrate and a specific amount of Pd(NO<sub>3</sub>)<sub>2</sub> solution with a theoretic Pd loading of 1 wt% were mixed and stirred for 20 min at room temperature. The obtained solution and NaOH solution were added into the distilled water, adjusting the final pH to 11. The as-prepared product was centrifuged, washed with deionized water and ethanol,

and then dried at 60 °C for 7 h. The product was calcined at 400 °C for 4 h (1 °C min<sup>-1</sup> ramping rate), then calcined at 600 °C or 1000 °C for 2 h with the same heating rate. The prepared samples were denoted as C-Pd/CeO<sub>2</sub>-*T*, where *T* represented the calcination temperature (*T* = 600, 1000 °C).

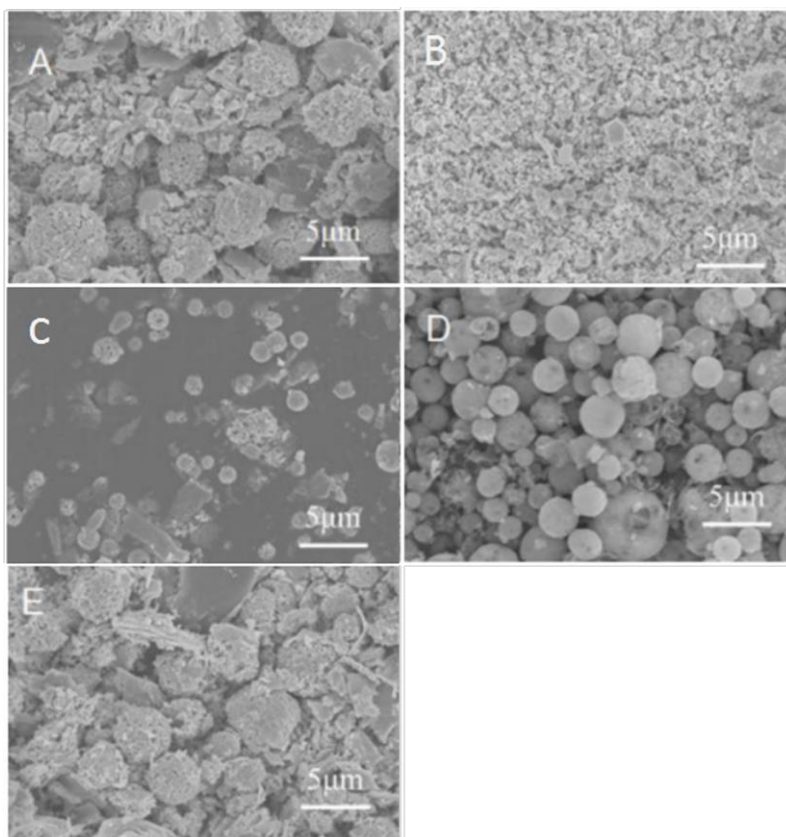

**Figure S1.** SEM images of H-Pd@CeO<sub>2</sub>-600(t) catalysts (A–E: t = 6, 12, 18, 24, 30).

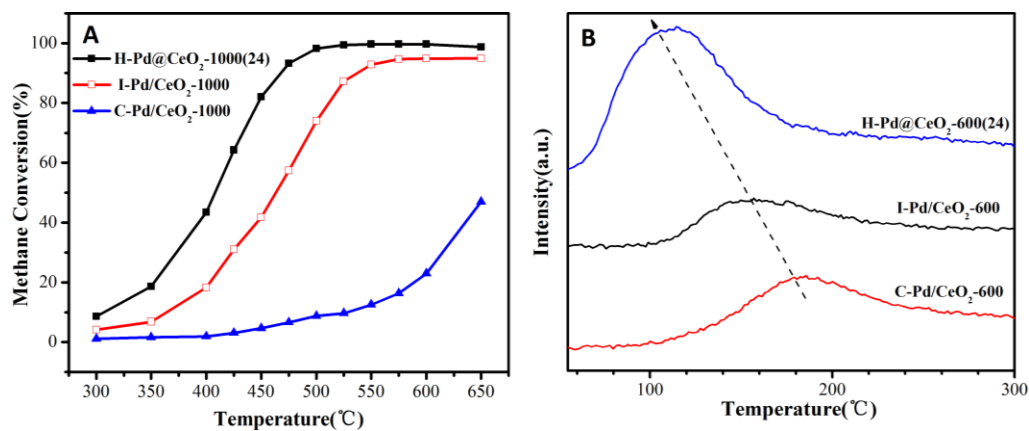

**Figure S2.** (A) Methane conversion and (B) CO<sub>2</sub>-TPD curves of H-Pd@CeO<sub>2</sub>-600(24), I-Pd/CeO<sub>2</sub>-600 and C-Pd/CeO<sub>2</sub>-600.

**Table S1** CO pulse adsorption results of the catalysts

| Catalyst                       | Pd Dispersion(%) | Pd particle size<br>(nm) |
|--------------------------------|------------------|--------------------------|
| H-Pd/CeO <sub>2</sub> -600(6)  | 5.34             | 21.0                     |
| H-Pd/CeO <sub>2</sub> -600(12) | 42.4             | 2.6                      |
| H-Pd/CeO <sub>2</sub> -600(18) | 40.3             | 2.8                      |
| H-Pd@CeO <sub>2</sub> -600(24) | 43.4             | 2.6                      |
| H-Pd/CeO <sub>2</sub> -600(30) | 42.5             | 2.6                      |
| I-Pd/CeO <sub>2</sub> -600     | 16.1             | 7.0                      |
| C-Pd/CeO <sub>2</sub> -600     | 6.1              | 18.6                     |

**Table S2** The relevant parameters of the catalysts obtained from XPS results

| Catalyst                       | Pd/Ce        | Ce <sup>3+</sup> in | Ce <sup>4+</sup> /Ce <sup>3+</sup> |
|--------------------------------|--------------|---------------------|------------------------------------|
|                                | atomic ratio | Ce(%)               | atomic ratio                       |
| H-Pd/CeO <sub>2</sub> -600(6)  | 0.0189       | 5.74                | 16.4                               |
| H-Pd/CeO <sub>2</sub> -600(12) | 0.0212       | 4.48                | 21.3                               |
| H-Pd/CeO <sub>2</sub> -600(18) | 0.0145       | 5.51                | 17.1                               |
| H-Pd@CeO <sub>2</sub> -600(24) | 0.0138       | 12.6                | 6.9                                |
| H-Pd/CeO <sub>2</sub> -600(30) | 0.0214       | 12.5                | 7.0                                |
